# Supplementary material for: Compliance With Malaria Rapid Diagnostic Testing by Community Health Workers in 3 Malaria-Endemic Countries of Sub-Saharan Africa: An Observational Study
Source: PubMed Central journal article supplement (PMC5146698; doi:10.1093/cid/ciw626), 2016-12-06
Supplement: supp_ciw626_ciw626supp.pdf [file supp_ciw626_ciw626supp.pdf]

**Supplementary table 1: Performance of CHWs who prescribed ACTs by treatment experience, by site.**

|                                                          | <b>Number<br/>CHWs</b> | <b>Total<br/>ACTs to<br/>RDT+ve<br/>cases</b> | <b>Total<br/>ACTs<br/>to<br/>RDT-<br/>ve<br/>cases</b> | <b>Mean<br/>days to<br/>first<br/>error</b> | <b>Error<br/>rate</b> | <b>Mean<br/>ACTs<br/>per<br/>CHW</b> | <b>SD</b> | <b>Min</b> | <b>Max</b> | <b>IQR -<br/>25%</b> | <b>IQR -<br/>75%</b> |
|----------------------------------------------------------|------------------------|-----------------------------------------------|--------------------------------------------------------|---------------------------------------------|-----------------------|--------------------------------------|-----------|------------|------------|----------------------|----------------------|
| <b>All CHWs</b>                                          |                        |                                               |                                                        |                                             |                       |                                      |           |            |            |                      |                      |
| Burkina                                                  | 49                     | 5357                                          | 8                                                      | -                                           | 0.1                   | 109.5                                | 64.6      | 19         | 343        | 64                   | 141                  |
| Nigeria                                                  | 42                     | 1631                                          | 17                                                     | -                                           | 1.0                   | 39.2                                 | 49        | 2          | 257        | 9                    | 46                   |
| Uganda                                                   | 158                    | 5639                                          | 4                                                      | -                                           | 0.1                   | 35.8                                 | 31.5      | 1          | 150        | 12                   | 56                   |
| Overall                                                  | 249                    | 12627                                         | 29                                                     | -                                           | 0.2                   | 50.9                                 | 51.8      | 1          | 343        | 15                   | 69                   |
| <b>CHWs who gave ACTs to RDT negative patients</b>       |                        |                                               |                                                        |                                             |                       |                                      |           |            |            |                      |                      |
| Burkina                                                  | 4                      | 508                                           | 8                                                      | 47.8                                        | 1.6                   | 127                                  | 47.9      | 94         | 197        | 96                   | 158                  |
| Nigeria                                                  | 11                     | 503                                           | 17                                                     | 60.3                                        | 3.4                   | 45.7                                 | 55.6      | 2          | 206        | 23                   | 43                   |
| Uganda                                                   | 2                      | 88                                            | 4                                                      | 14.5                                        | 4.5                   | 43.5                                 | 31.8      | 22         | 61         | 21                   | 66                   |
| Overall                                                  | 17                     | 1099                                          | 29                                                     | 51.9                                        | 2.6                   | 64.6                                 | 60.8      | 2          | 206        | 23                   | 94                   |
| <b>CHWs who never gave ACTs to RDT negative patients</b> |                        |                                               |                                                        |                                             |                       |                                      |           |            |            |                      |                      |
| Burkina                                                  | 45                     | 4849                                          | -                                                      | -                                           | 0                     | 108                                  | 66.1      | 19         | 343        | 64                   | 141                  |
| Nigeria                                                  | 31                     | 1128                                          | -                                                      | -                                           | 0                     | 36.9                                 | 47.2      | 3          | 257        | 9                    | 55                   |
| Uganda                                                   | 156                    | 5551                                          | -                                                      | -                                           | 0                     | 35.7                                 | 31.6      | 1          | 150        | 12                   | 56                   |
| Overall                                                  | 232                    | 11528                                         | -                                                      | -                                           | 0                     | 49.9                                 | 51.1      | 1          | 343        | 14                   | 68                   |
